# Supplementary material
Source: PubMed Central journal article supplement (PMC5710254)
Supplement: jamapsychiatry-74-719-s001.pdf [file jamapsychiatry-74-719-s001.pdf]

1  
2  
3  
4  
5  
6  
7  
8  
9  
10  
11  
12  
13  
14  
15  
16  
17  
18  
19  
20  
21  
22  
23  
24  
25

**Table of content**

**SUMMARY OF CHANGES TO THE STATISTICAL ANALYSIS PLAN..... 2**  
**FINAL STATISTICAL ANALYSIS PLAN..... 3**  
**SUMMARY OF CHANGES IN THE PROTOCOL..... 7**  
**ORIGINAL PROTOCOL, VERSION 1.2..... 8**

26 **Summary of changes to the statistical analysis plan**

27 The original statistical analysis plan is described in the original protocol, version 1.2 provided  
28 below.

29 Before any unblinding of treatment groups was performed, the final statistical analysis plan was  
30 uploaded to [clinicaltrials.gov](http://clinicaltrials.gov). All analyses were carried out with the treatment groups still blinded  
31 and labeled as "treatment group A" and "treatment group B". If requested, the Email  
32 correspondence with the unblinded nurse regarding unblinding can be forwarded.

33

34 In the original statistical analysis plan missing data were handled by last observation carried  
35 forward. However, a decision was made to use mixed model of repeated measurements to reduce  
36 the risk of bias. Mixed model was used for all analyses including the primary endpoint (change in  
37 glucose tolerance).

38

39 Furthermore, the study was intended to be exploratory with an estimated sample size of 100  
40 participants. However, it was possible to perform a precise power calculation based on unpublished  
41 baseline data from individuals with and without impaired glucose tolerance (IGT) following a 4-  
42 hour 75-grams OGTT from the study: "The Impact of Liraglutide on Glucose Tolerance and the  
43 Risk of Type 2 Diabetes in Women With Previous Pregnancy-induced Diabetes".(1)

44 The power calculation resulted in a sample size of 96 participants, similar to the initial estimation.

45

46 Reference List

47 1. Foghsgaard S, Vedtofte L, Mathiesen ER et al. The effect of a glucagon-like peptide-1 receptor  
48 agonist on glucose tolerance in women with previous gestational diabetes mellitus: protocol for an  
49 investigator-initiated, randomised, placebo-controlled, double-blinded, parallel intervention trial.  
50 *BMJ Open* 2013;3(10):e003834.

51

52

53

54

55

56

57 **Final statistical analysis plan**

58

59 Power calculation

60 A sample size of 96 participants (48 in each group) was estimated, with two-sided t-testing, an  $\alpha$  of  
61 5% and a power of 90%. The power calculation was based on the primary outcome measurement:  
62 Change in glucose tolerance. The glucose tolerance was estimated by the total Area Under the  
63 Curve (AUC) following a 4-hour 75-grams Oral Glucose Tolerance Test (OGTT). The expected  
64 mean total AUC for the plasma glucose excursion following a 4-hour 75-grams OGTT was  
65 estimated as 1695 (SD 158) and 1800 (SD 158) after 16 weeks of treatment for the liraglutide and  
66 liraglutide placebo group, respectively. The difference in total AUC was based on unpublished data  
67 in individuals with and without Impaired Glucose Tolerance (IGT) following a 4-hour 75-grams  
68 OGTT at baseline from the study: "The Impact of Liraglutide on Glucose Tolerance and the Risk of  
69 Type 2 Diabetes in Women With Previous Pregnancy-induced Diabetes".(1)

70

71 Procedure

72 All analyses will be carried out with the treatment groups still blinded and labeled as "treatment  
73 group A" and "treatment group B". Before dividing participants into group A and group B, the  
74 statistical plan was completed and uploaded on clinicaltrials.gov, and the data set was locked. The  
75 final unblinding of treatment groups (liraglutide or liraglutide placebo), will not be carried out until  
76 all statistical analyses are performed. All analyses will be performed using SAS 9.4, with  $\alpha$  set at  
77 0.05 and two-sided testing.

78 All efficacy analyses will be performed using a modified intention-to-treat principle. All  
79 participants who were randomized, received at least one dose of the trial compound (liraglutide or  
80 liraglutide placebo) and who had at least one assessment after baseline will be included in the  
81 efficacy analyses. All safety analyses will be performed in the intent-to-treat sample that includes  
82 all participants, who were randomized and received at least one dose of the trial compound  
83 (liraglutide or liraglutide placebo).

84

85 Primary endpoint

86 The primary endpoint is the change in glucose tolerance following a 4-hour 75-grams OGTT from  
87 week 0 to week 16. During the 4-hour 75-grams OGTT, blood was sampled at fixed time points: -

88 15, -10, 0, 5, 10, 15, 20, 30, 40, 50, 60, 90, 120, 150, 180, and 240 minutes. An analysis of  
89 covariance (ANCOVA) will be use to analyze change in glucose tolerance from week 0 to week 16  
90 using mixed model analyses for the plasma glucose levels for the liraglutide and the liraglutide  
91 placebo group, respectively. In case of relevant baseline differences between the two groups,  
92 demographic, illness or treatment parameters will be included in the model as fixed effects together  
93 with the baseline value of the OGTTs as a covariate.

94

#### 95 Secondary endpoints

96 Blood was also sampled for analyses of C-peptide, glucagon and incretin hormones in response to  
97 the glucose load at the same fixed time points during the OGTT. Change in secretion of C-peptide,  
98 glucagon and incretin hormones from week 0 to week 16 will also be evaluated using mixed model  
99 ANCOVA analyses for the liraglutide and liraglutide placebo group, respectively. In case of  
100 relevant baseline differences between the two groups, demographic, illness or treatment parameters  
101 will be included in the model as fixed effects together with the baseline value of the relevant  
102 variable as a covariate.

103

104 Most secondary endpoints were repeated every 4 weeks. Few secondary endpoints were only  
105 repeated at week 0 and 16. For all repeated measurements a mixed model ANCOVA analyses will  
106 be use to analyze mean change in continuous outcomes from week 0 to week 16 for the liraglutide  
107 and the liraglutide placebo group, respectively. In case of relevant baseline differences between the  
108 two groups, demographic, illness or treatment parameters will be included in the model as fixed  
109 effects together with the baseline value of the relevant variable as a covariate. Change in categorical  
110 outcomes from week 0 to week 16 will be analyzed using mixed model logistic regression with the  
111 same fixed effects and covariates as described for the continuous outcomes.

112 For secondary endpoints without repeated measurements, missing data imputations will be made  
113 using Multiple Imputation of Chained Equations (MICE).

114

115 For continuous outcomes without repeated measurements, outcomes will be analyzed using  
116 ANCOVA to detect differences between the liraglutide and the liraglutide placebo group. In the  
117 model baseline demographic, illness or treatment parameters will be included. Categorical  
118 outcomes without repeated measurements will be analyzed using a multiple mixed effect logistic

119 regression analysis model, where baseline demographic, illness or treatment parameters will be  
120 included.

121

122

123 Subgroup and sensitivity analyses

124 Subgroup and sensitivity analyses will be performed to assess the robustness of the primary  
125 analyses. These analyses will be performed using regression analysis for continuous outcomes and  
126 logistic regression for categorical outcomes. The analyses will consider clinically or mechanistically  
127 relevant baseline and intra-treatment variables, including:

128• Gender

129• Smoking

130• Antipsychotics (clozapine vs olanzapine; monopharmacy vs polypharmacy with other antipsychotic  
131 medications)

132• Lipid profile

133• Liver function

134• Different groups of dysglycaemia:

135 a. HbA1c:  $43 \text{ mmol/mol} \leq \text{HbA1c} \leq 47 \text{ mmol/mol}$ , vs

136 b. Impaired fasting glucose (IFG): Fasting plasma glucose (FPG):  $6.1 \text{ mmol/l} \leq \text{FPG} \leq 6.9$   
137  $\text{mmol/l}$  and  $\text{HbA1c} < 48 \text{ mmol/mol}$ , vs

138 c. Impaired glucose tolerance (IGT): two-hour plasma glucose after 75-g oral glucose  
139 tolerance test  $>7.8 \text{ mmol/l}$  with a  $\text{FPG} < 7.0 \text{ mmol/l}$  and  $\text{HbA1c} < 48 \text{ mmol/mol}$

140•  $\text{IGT} < 11.1 \text{ mmol/l}$  vs  $\text{IGT} > 11.0 \text{ mmol/l}$

141• Liraglutide treatment (1.2 mg vs 1.8 mg liraglutide)

142• Weight

143• Add-on psychotropic drugs/classes (antidepressants, anxiolytics etc. vs no add-on)

144• Antihypertensive treatment vs no antihypertensive treatment

145• Lipid lowering treatment vs no lipid lowering treatment

146• Changes in antipsychotic medication ( $> 20\%$  change in dose vs  $< 20\%$  change in dose vs no  
147 changes in dose for clozapine or olanzapine, respectively)

148• Inhalation steroid vs no inhalation steroid

149• Body composition

150• Insulin resistance

- 151• Beta-cell function
- 152• Incretin hormones
- 153• Psychopathologic rating scales
- 154• Alcohol consumption
- 155• Length of disease
- 156• Diagnosis (schizophrenia vs schizotypal disorder vs paranoid psychosis)
- 157• Side effects
- 158• Serious adverse events
- 159
- 160

161 **Summary of changes in the protocol**

162

| <b>Protocol version</b> | <b>Amendment</b>                                                                                          | <b>Approval from the Danish Health Authority</b>            | <b>Approval from the Ethics Committee</b> |
|-------------------------|-----------------------------------------------------------------------------------------------------------|-------------------------------------------------------------|-------------------------------------------|
| <b>Version 1.2</b>      | First final protocol                                                                                      | March 15, 2013                                              | March 27, 2013                            |
| <b>Version 1.3</b>      | Screening for eligible patients in hospital records                                                       | N/A. Only the Ethics Committee had to approve the amendment | August 20, 2013                           |
| <b>Version 1.4</b>      | Sub-study: “Cambridge”. Extra blood sampling for proteomic fingerprinting                                 | December 12, 2013                                           | November 25, 2013                         |
| <b>Version 1.5</b>      | Expansion of recruitment area. Still single site study                                                    | N/A. Only the Ethics Committee had to approve the amendment | January 16, 2014                          |
| <b>Version 2.0</b>      | 1-year follow-up                                                                                          | September 17, 2014                                          | September 3, 2014                         |
| <b>Version 2.1</b>      | Adding second site: Aalborg                                                                               | January 19, 2015                                            | January 12, 2015                          |
| <b>Version 3.0</b>      | Modification of inclusion criteria: Expansion of definition of prediabetes. Prolongation of study period. | June 2, 2015                                                | May 12, 2015                              |
| <b>Version 3.1</b>      | Sub-study: Examination of 10 healthy controls for baseline comparisons                                    | October 23, 2015                                            | October 23, 2015                          |
| <b>Version 3.2</b>      | Prolongation of study period                                                                              | February 22, 2016                                           | February 5, 2016                          |

163

164

165

166 **Original protocol, version 1.2**

167

168 **CLINICAL TRIAL PROTOCOL**

169

170 **Compound** VICTOZA®

171

172 **Protocol title**

173

174 Does a GLP-1 receptor agonist change glucose tolerance in antipsychotic-treated patients?

175

176 **EudraCT number:** 2013-000121-31

177

178 **UTN-number:** U1111-1128-3404

179

180

181 Protocol date/status 11-1-2013; final (version 2)

182

183 **SPONSOR-INVESTIGATOR**

184 Anders Fink-Jensen MD DMSci

185 Professor

186 Department of Psychiatry O

Sign: \_\_\_\_\_

187 Psychiatric Centre Copenhagen

188 University of Copenhagen, Denmark

Date: \_\_\_\_\_

189

190 **CO-INVESTIGATORS**

191 Tina Vilsbøll MD DMSc

192 Head of Diabetes Research Division

193 Department of Internal Medicine

Sign: \_\_\_\_\_

194 Gentofte Hospital

195 University of Copenhagen, Denmark

Date: \_\_\_\_\_

196

197 **MONITORATION OF THE STUDY ACCORDING TO GCP**

198 The GCP Unit, University of Copenhagen, Bispebjerg Hospital, Bygning 51, 3., Bispebjerg Bakke 23,

199 2400 Copenhagen NV.

200

201 **FINANCIAL SUPPORT**

202 The study has not yet received financial support.

203

204 **COLLABORATORS**

205 Peter W Jepsen, MD, PhD and Thomas Middelbo, MD, PhD, Department of Psychiatry O,

206 Psychiatric Centre Copenhagen, University of Copenhagen, Denmark

207

208 Novo Nordisk A/S affiliate contact person: Esben Selmer Buhl, MD, PhD, Medical Advisor, Clinical,

209 Medical and Regulatory Affairs, Novo Nordisk Scandinavia AB, Region Denmark



210 Novo Nordisk A/S: Supplier of intervention medication (Liraglutide 6.0 mg/mL, 3.0 mL pre-filled  
211 pen-injectors and Liraglutide placebo, 3.0 mL pre-filled pen-injectors  
212

### 213 **Protocol summary**

214 Compound Liraglutide 6.0 mg/mL, 3.0 mL pre-filled pen-injector (Victoza®) vs.  
215 Liraglutide placebo, 3.0 mL pre-filled pen-injector

216

217 Study title Does a GLP-1 receptor agonist change glucose tolerance in antipsychotic-  
218 treated patients?

219 Scientific group Tina Vilsbøll MD DMSs, Diabetes Research Division, Gentofte Hospital,  
220 and Anders Fink-Jensen MD DMSc, Department O (Rigshospitalet),  
221 Psychiatric Centre Copenhagen, University of Copenhagen, Denmark

222 Study location Diabetes Research Division, Gentofte Hospital, University of  
223 Copenhagen, DK-2900 Hellerup, Denmark and Department O  
224 (Rigshospitalet), Psychiatric Centre Copenhagen, DK-2100 Copenhagen,  
225 Denmark.

226 Key dates Start of recruitment Q1, 2013  
227 Last treatment Q3, 2015  
228 Recruitment duration 30 months

229 Objective To investigate the effects of the GLP-1 receptor agonist Liraglutide 6.0  
230 mg/mL, 3.0 mL pre-filled pen-injector (Victoza®) vs. Liraglutide placebo,  
231 3.0 mL pre-filled pen-injector.

232 Study design Double-blind, randomized, placebo-controlled, 16-weeks clinical trial

233 Patients Volunteers with a diagnosis of schizophrenia, schizotypal disorder or  
234 paranoid psychosis between age 18 years and 65 years with  
235 dysglycaemia, a body mass index (BMI)  $\geq 27$  kg/m<sup>2</sup> and on antipsychotic  
236 medical treatment.

237 Sample size Hundred patients will be included in the study.

238 Procedure At inclusion, patients will be randomized to Liraglutide 6.0 mg/mL, 3.0  
239 mL pre-filled pen-injector or Liraglutide placebo, 3.0 mL pre-filled pen-  
240 injector and blood sampling and DEXA scan will be performed. In  
241 addition blood pressure, OGTT, self-reported dietary, height, waist  
242 circumference and exercise are recorded and the patients are rated by  
243 use of the Schizophrenia Quality of Life Scale (SQLS), the Clinical Global  
244 Impression - Severity Scale (CGI-S), the Clinical Global Improvement  
245 Scale (CGI-S), Alcohol Use Disorders Identification Test (AUDIT) and the  
246 Global Assessment of Psychosocial Disability (GAPD) scale. The patients

247 will be treated for 16 weeks with daily subcutaneous injection of  
248 Liraglutide 6.0 mg/mL, 3.0 mL pre-filled pen-injector or Liraglutide  
249 placebo, 3.0 mL pre-filled pen-injector. The initial daily dose of  
250 Liraglutide 6.0 mg/mL, 3.0 mL pre-filled pen-injector will be 0.6 mg for  
251 one week, 1.2 mg the following week and then 1.8 mg for the remaining  
252 14 weeks treatment period. At follow up, week 4, 8, 12 and 16, the  
253 majority of tests will be repeated (se table 1).

254 Endpoints The primary endpoint is the change from baseline in glucose tolerance  
255 (measured by area under the curve (AUC) for the plasma glucose (PG)  
256 excursion following a 4-hour 75 g Oral Glucose Tolerance Test (OGTT).  
257 Secondary endpoints include changes of dysglycaemia (impaired fasting  
258 glucose (IFG), impaired glucose tolerance (IGT), combined IFG/IGT or  
259 diabetes), changes in body weight, waist circumference, blood pressure,  
260 secretion of incretin hormones, insulin sensitivity and beta cell function,  
261 evaluated by homeostatic model assessment (HOMA), DEXA scanning  
262 (body composition), lipid profile, liver function, dietary, exercise records  
263 and measures of psychopathology, alchohol use and quality of life.  
264

265 Safety Blood samples will be collected during the entire study period to  
266 monitor safety parameters.  
267

268 Study duration Sixteen weeks  
269  
270  
271  
272  
273  
274  
275  
276  
277  
278  
279  
280  
281  
282  
283  
284  
285  
286  
287

288

289

290

## TABLE OF CONTENTS

|     |          |                                                                       |                              |
|-----|----------|-----------------------------------------------------------------------|------------------------------|
| 291 | <b>1</b> | <b>INTRODUCTION</b> .....                                             | ERROR! BOOKMARK NOT DEFINED. |
| 292 | 1.1      | CLINICAL EXPERIENCE .....                                             | ERROR! BOOKMARK NOT DEFINED. |
| 293 | 1.2      | BENEFITS AND RISKS .....                                              | ERROR! BOOKMARK NOT DEFINED. |
| 294 | 1.3      | CLINICAL TRIAL REGULATIONS.....                                       | ERROR! BOOKMARK NOT DEFINED. |
| 295 | <b>2</b> | <b>OBJECTIVES OF THE TRIAL</b> .....                                  | ERROR! BOOKMARK NOT DEFINED. |
| 296 | <b>3</b> | <b>INVESTIGATIONAL TRIAL DESIGN</b> .....                             | ERROR! BOOKMARK NOT DEFINED. |
| 297 | 3.1      | STUDY ENDPOINTS .....                                                 | ERROR! BOOKMARK NOT DEFINED. |
| 298 | 3.1.1    | <i>Primary endpoints</i> .....                                        | 15                           |
| 299 | 3.1.2    | <i>Secondary endpoints</i> .....                                      | 15                           |
| 300 | 3.2      | STUDY DESIGN.....                                                     | 15                           |
| 301 | 3.3      | COMPARATIVE TREATMENT REGIMES .....                                   | 15                           |
| 302 | 3.4      | RANDOMISATION AND BLINDING .....                                      | 15                           |
| 303 | 3.5      | DESCRIPTION OF INVESTIGATIONAL DRUG AND PLACEBO DRUG .....            | 16                           |
| 304 | 3.6      | DRUG ORDERING AND STORAGE .....                                       | 16                           |
| 305 | 3.7      | DRUG ACCOUNTABILITY .....                                             | 17                           |
| 306 | 3.8      | STUDY DURATION .....                                                  | 16                           |
| 307 | 3.9      | TRIAL TIMETABLE .....                                                 | 17                           |
| 308 |          | <b>THE ANTICIPATED TIMETABLE FOR THE TRIAL IS:</b> .....              | 17                           |
| 309 | <b>4</b> | <b>PATIENT SELECTION</b> .....                                        | 17                           |
| 310 | 4.1      | NUMBER OF PATIENTS AND TARGET POPULATION .....                        | 17                           |
| 311 | 4.2      | PATIENT SCREENING .....                                               | ERROR! BOOKMARK NOT DEFINED. |
| 312 | 4.3      | INCLUSION CRITERIA .....                                              | 18                           |
| 313 | 4.4      | EXCLUSION CRITERIA .....                                              | 18                           |
| 314 | 4.5      | PATIENT WITHDRAWAL .....                                              | 18                           |
| 315 | <b>5</b> | <b>TREATMENT PROCEDURE</b> .....                                      | 19                           |
| 316 | 5.1      | PRE-TREATMENT EVALUATION .....                                        | 19                           |
| 317 | 5.2      | TREATMENT EVALUATION.....                                             | ERROR! BOOKMARK NOT DEFINED. |
| 318 | <b>6</b> | <b>ASSESSMENT OF EFFICACY</b> .....                                   | ERROR! BOOKMARK NOT DEFINED. |
| 319 | 6.1      | CLINICAL RESPONSE.....                                                | ERROR! BOOKMARK NOT DEFINED. |
| 320 | 6.2      | BLOOD SAMPLES.....                                                    | ERROR! BOOKMARK NOT DEFINED. |
| 321 | <b>7</b> | <b>ASSESSMENT OF SAFETY</b> .....                                     | 23                           |
| 322 | 7.1      | SERIOUS ADVERSE EVENT (SAE) AND SERIOUS ADVERSE REACTIONS (SAR) ..... | 23                           |
| 323 | 7.1.1    | <i>Definition of SAE and SAR</i> .....                                | 23                           |
| 324 | 7.1.2    | <i>Reporting of SAE and SAR</i> .....                                 | 23                           |
| 325 | 7.1.3    | <i>Suspected unexpected serious adverse reaction (SUSAR)</i> .....    | 24                           |
| 326 | 7.2      | ADVERSE EVENT.....                                                    | 24                           |
| 327 | 7.2.1    | <i>Definition of adverse event</i> .....                              | 24                           |
| 328 | 7.2.2    | <i>Reporting of adverse event</i> .....                               | 25                           |
| 329 | 7.2.3    | <i>Assessment of adverse event</i> .....                              | 25                           |
| 330 | 7.3      | REPORTING AT THE END OF THE STUDY .....                               | 25                           |
| 331 | <b>8</b> | <b>STATISTICAL EVALUATION</b> .....                                   | 25                           |
| 332 | 8.1      | STATISTICAL ANALYSES.....                                             | 25                           |

|     |           |                                                               |                                     |
|-----|-----------|---------------------------------------------------------------|-------------------------------------|
| 333 | 8.2       | JUSTIFICATION OF SAMPLE SIZE .....                            | <b>ERROR! BOOKMARK NOT DEFINED.</b> |
| 334 | 8.3       | DISPOSITION OF PATIENTS .....                                 | 26                                  |
| 335 | 8.4       | END OF THE STUDY BEFORE TIME .....                            | 26                                  |
| 336 | <b>9</b>  | <b>DATA MANAGEMENT .....</b>                                  | <b>26</b>                           |
| 337 | 9.1       | SOURCE DATA IDENTIFICATION AND SOURCE DATA VERIFICATION ..... | 26                                  |
| 338 | 9.2       | SUBJECT DATA PROTECTION .....                                 | 26                                  |
| 339 | 9.3       | DATA HANDLING.....                                            | 27                                  |
| 340 | <b>10</b> | <b>ADMINISTRATIVE PROCEDURES .....</b>                        | <b>27</b>                           |
| 341 | 10.1      | INSURANCE .....                                               | 27                                  |
| 342 | 10.2      | ETHICS COMMITTEE (EC) / INSTITUTIONAL REVIEW BOARD .....      | 27                                  |
| 343 | 10.3      | ETHICAL CONSIDERATIONS.....                                   | 27                                  |
| 344 | 10.4      | PATIENT INFORMED CONSENT .....                                | 28                                  |
| 345 | 10.5      | REGULATORY AFFAIRS.....                                       | 28                                  |
| 346 | 10.6      | TRIAL MONITORING.....                                         | 29                                  |
| 347 | 10.7      | TRIAL AUDITS AND INSPECTIONS .....                            | 29                                  |
| 348 | 10.8      | FINANCING .....                                               | <b>ERROR! BOOKMARK NOT DEFINED.</b> |
| 349 | <b>11</b> | <b>CONFIDENTIALITY AND COMMUNICATION OF RESULTS .....</b>     | <b>29</b>                           |
| 350 | 11.1      | PUBLICATION .....                                             | 29                                  |
| 351 | <b>12</b> | <b>REFERENCES.....</b>                                        | <b>ERROR! BOOKMARK NOT DEFINED.</b> |
| 352 | <b>13</b> | <b>BUDGET.....</b>                                            | <b>ERROR! BOOKMARK NOT DEFINED.</b> |
| 353 |           |                                                               |                                     |
| 354 |           |                                                               |                                     |
| 355 |           |                                                               |                                     |
| 356 |           |                                                               |                                     |
| 357 |           |                                                               |                                     |
| 358 |           |                                                               |                                     |
| 359 |           |                                                               |                                     |
| 360 |           |                                                               |                                     |
| 361 |           |                                                               |                                     |
| 362 |           |                                                               |                                     |
| 363 |           |                                                               |                                     |

# 364 **1 INTRODUCTION**

365

## 366 **1.1 Clinical experience**

367 Metabolic disturbances, overweight and obesity in antipsychotic-treated patients are a major  
368 clinical problem (1) that most likely results from the interaction of medication, genes and lifestyle  
369 factors such as physical inactivity and possible high fat diet. However, the mechanisms underlying  
370 antipsychotic cardiometabolic adverse effects are incompletely understood (2).

371 Recently, glucagon-like peptide-1 (GLP-1) based therapy was introduced to the market for the  
372 treatment of type 2 diabetes (3). GLP-1 is an incretin hormone, which is secreted from endocrine  
373 L-cells of the small intestine in response to nutrients in the gut lumen (4). GLP-1 conveys an  
374 insulintropic effect via GLP-1 receptors on the beta cells of pancreas and inhibits the secretion of  
375 glucagon from the alpha cells of the pancreas, which together lower the blood glucose level (4).  
376 Thus, GLP-1 is central for glycaemic control. Both of these effects are strictly glucose-dependent  
377 (more pronounced at higher levels of blood glucose) and the effect ceases as the level of blood  
378 glucose reaches values below 4-5 mmol/L. Therefore, the GLP-1 receptor (GLP-1R) agonist keeps  
379 the blood glucose at normal levels without increasing the risk of hypoglycaemia (5). Liraglutide,  
380 one of the GLP-1R agonists, has 97% homology with naturally occurring GLP-1 hormone but has a  
381 significant longer half-life (12–14 hours).

382 Antipsychotic medication treatment is often associated with obesity and metabolic disorders (1,2).  
383 Psychiatric patients on antipsychotic treatment, especially those who are overweight or obese  
384 and/or who have metabolic disturbances, are often encouraged to increase physical activity.  
385 Studies with type 2 diabetes patients have shown that different types of exercise interventions  
386 with supervised training have positive effects on glycaemic control (6). Exercise improves the  
387 aerobic capacity and muscular strength, which is often related to fat loss, increased muscle mass,  
388 increased cardiovascular fitness and improved glycaemic control. Exercise-induced fat loss and  
389 increase in muscle mass may improve glycaemic control and insulin sensitivity in these patients,  
390 even in the absence of absolute weight loss. However, in clinical practice exercise interventions in  
391 antipsychotic treated patients has often proven to be difficult (7). Another possibility includes  
392 instructions about a healthier food intake (7). This has proven efficacious in some patients, but not  
393 in others, and there exist a large group of patients where healthy life style interventions has only  
394 very little effect. Another possibility, if patients are treated with a weight-increasing agent, would  
395 be to shift medical treatment to a compound with less weight-increasing potential (8,9). However,  
396 two of the most potent weight-inducing antipsychotics, clozapine and olanzapine are also two of  
397 the most efficacious antipsychotic compounds and especially clozapine is often used to treat  
398 patients with only minor effects of other obtainable antipsychotic compounds (10). Consequently,  
399 switch of antipsychotic treatment is often not possible in these cases.

400 While a number of add-on treatments have been tried to mitigate antipsychotic induced weight  
401 gain, a recent meta-analysis of 32 studies in 1,482 patients found only 5 agents to be superior to  
402 placebo (11). Due to adverse effects, fenfluramine and sibutramine, two of these agents, have  
403 since been removed from the market. Reboxetine had the lowest effect and cannot be used in  
404 bipolar disorder. Thus, only metformin and topiramate, both leading to approximately 2.5-3.0 kg

405 weight loss compared to placebo, are the only currently usable augmentation agents (11).  
406 Nevertheless, little is known about metabolic advantages of these two add-on agents, and most  
407 studies were small (11).

408 Consequently, there exist a large and important group of antipsychotic treated patients who are in  
409 urgent need for medical interventions to improve their metabolic status, so risk factors for that  
410 life-shortening cardiovascular morbidity can be reduced. In this context, it is promising that studies  
411 have shown that patients with type 2 diabetes treated with GLP-1R agonists improve glycaemic  
412 control. The proposed study will attempt to extend these beneficial findings to the psychiatric  
413 population receiving antipsychotic medication treatment.

414

## 415 **1.2 Benefits and risks**

416 Liraglutide 6.0 mg/mL, 3.0 mL pre-filled pen-injector (Victoza®) is approved and marketed as non-insulin,  
417 once-daily medication for patients with T2DM. Besides control of the PG levels, Liraglutide 6.0 mg/mL, 3.0  
418 mL pre-filled pen-injector may provide the additional benefit of body weight loss. The patients in the  
419 present study suffer from schizophrenia and obesity and we expect to see improved glucose tolerance in  
420 patients treated with Liraglutide 6.0 mg/mL, 3.0 mL pre-filled pen-injector. The risks attributed to  
421 Liraglutide 6.0 mg/mL, 3.0 mL pre-filled pen-injector are mainly related to gastrointestinal symptoms. The  
422 most common adverse events include nausea, vomiting, headache and diarrhoea, which most often cease  
423 with time (weeks). Less commonly, the patients may experience stomach pain, constipation, fever, reflux,  
424 gastritis or dizziness. Liraglutide 6.0 mg/mL, 3.0 mL pre-filled pen-injector can be injected subcutaneously in  
425 the abdomen, in the thigh or in the upper arm. Patients will receive detailed information in writing and  
426 orally about the risk of adverse events. If the patients find the adverse events unacceptable, they are free  
427 to withdraw from the study without any further explanation.

428

## 429 **1.3 Clinical trial regulations**

430 The trial will be monitored by the GCP unit of Copenhagen University. The clinical trial will be conducted in  
431 compliance with the protocol, according to ICH E6: Good Clinical Practice: Consolidated guideline,  
432 CPMP/ICH/135/95, and national guidelines including Clinical Trials Directive 2001/20/EC. The trial can be  
433 subjected to quality audit.

434

## 435 **2 OBJECTIVES OF THE TRIAL**

436

437 The objective of this study is to investigate long term (16 weeks) effects of Liraglutide 6.0 mg/mL,  
438 3.0 mL pre-filled pen-injector or Liraglutide placebo, 3.0 mL pre-filled  
439 pen-injector  
440 on glucose tolerance in patients with a diagnosis of schizophrenia, schizotypal disorder or  
441 paranoid psychosis between age 18 years and 65 years with dysglycaemia, a body mass index  
442 (BMI)  $\geq 27$  kg/m<sup>2</sup> and on antipsychotic medical treatment with clozapine or olanzapine.

443

## 444 **3 INVESTIGATIONAL TRIAL DESIGN**

445

### 446 **3.1 Study endpoints**

447

#### 448 **3.1.1 Primary endpoint**

449 The primary endpoint is the change in glucose tolerance from baseline (measured by area under  
450 the curve (AUC) for the plasma glucose (PG) excursion following a 4-hour 75 g oral glucose  
451 tolerance test (OGTT)) to follow up at week 16 or to last observation if study participation is  
452 stopped earlier.

#### 453 **3.1.2 Secondary endpoints**

454 Secondary endpoints include changes of dysglycaemia (impaired fasting glucose (IFG), impaired  
455 glucose tolerance (IGT), combined IFG/IGT or diabetes), changes in body weight, waist circumference,  
456 blood pressure, secretion of incretin hormones, insulin sensitivity and beta cell function, evaluated by  
457 homeostatic model assessment (HOMA), DEXA scanning (body composition), lipid profile, liver function,  
458 dietary, exercise records and measures of psychopathology, alcohol use and quality of life from  
459 baseline to follow up at week 16 or to last observation if study participation is stopped earlier.

460

### 461 **3.2 Study design**

462 A double-blind, randomized, parallel, placebo-controlled clinical trial has been chosen in accordance with  
463 the trial objectives.

464

### 465 **3.3 Comparative treatment regimes**

466 Treatment with: 1) Liraglutide 6.0 mg/mL, 3.0 mL pre-filled pen-injector or 2) Liraglutide placebo,  
467 3.0 mL pre-filled pen-injector.

468

### 469 **3.4 Randomisation and blinding**

470 Patients will be randomized to treatment with 1) Liraglutide 6.0 mg/mL, 3.0 mL pre-filled pen-injector  
471 or 2) Liraglutide placebo, 3.0 mL pre-filled pen-injector. The randomization will be carried out by  
472 drawing sealed opaque envelopes with the randomization code.

473 The supplier of Victoza<sup>®</sup> pens, i.e. Liraglutide 6.0 mg/mL, 3.0 mL pre-filled pen-injectors and placebo  
474 pens, i.e. Liraglutide placebo, 3.0 mL pre-filled pen-injectors (Novo Nordisk) will be responsible for  
475 labelling and blinding the Liraglutide 6.0 mg/mL, 3.0 mL pre-filled pen-injectors and Liraglutide placebo, 3.0  
476 mL pre-filled pen-injectors before beginning of the treatment period and for generating the randomization

477 code. An emergency code will be kept at Gentofte Hospital and Psychiatric Centre Copenhagen if a patient  
478 develops adverse events that demand knowledge on the treatment, the code may be broken.

479

### 480 **3.5 Description of investigational drug and placebo drug**

481 Victoza<sup>®</sup> (Liraglutide 6.0 mg/mL, 3.0 mL pre-filled pen-injector) is supplied in pens for injection containing  
482 1.8 mg of the GLP-1 agonist liraglutide in 3.0 ml sterile water with disodiumphosphate and propylenglycol,  
483 and phenol for conservation (pH 8.15). Commercial pens will be used. Direction for use (DFU) will be given  
484 together with trial products.

485 *Liraglutide 6.0 mg/mL, 3.0 mL pre-filled pen-injector*

486 The initial daily dose will be 0.6 mg for one week, 1.2 mg the following week and then 1.8 mg for the  
487 remaining treatment period. Patients who, due to adverse events, do not tolerate up-titration to 1.2 or 1.8  
488 mg Liraglutide 6.0 mg/mL, 3.0 mL pre-filled pen-injector will remain on 0.6 or 1.2 mg of Liraglutide 6.0  
489 mg/mL, 3.0 mL pre-filled pen-injector, respectively. The injection is administered once daily.

490 *Liraglutide placebo, 3.0 mL pre-filled pen-injector*

491 The Liraglutide placebo, 3.0 mL pre-filled pen-injectors contain "Victoza-vehicle" (no active drug) and are  
492 administered in the same way and volume as Victoza<sup>®</sup>. The Liraglutide placebo, 3.0 mL pre-filled pen-  
493 injectors are specially packed for this study and will be used in the study only.

494

### 495 **3.6 Drug storage**

496 The pens are delivered in separate boxes. Storage and in-use conditions: Not in use: The Liraglutide 6.0  
497 mg/mL, 3.0 mL pre-filled pen-injectors must be stored in a refrigerator at a temperature between +2°C  
498 and + 8°C. Store away from the freezer compartment. Do not freeze and do not use if it has been frozen. In-  
499 use: After first opening, the Liraglutide 6.0 mg/mL, 3.0 mL pre-filled pen-injectors can be stored for one  
500 month at temperatures between 10°C and 30°C or in a refrigerator (2°C-8°C).. The pens must be protected  
501 from all sources of light, and the pen caps should be kept on when the pen is not in use. The Liraglutide 6.0  
502 mg/mL, 3.0 mL pre-filled pen-injectors should not be used if it does not appear clear and colourless

503

### 504 **3.7 Drug accountability**

505 One investigator will be responsible for drug accountability. For each patient treated, the batch number of  
506 the pen must be documented and the patients will be asked to return the pens after usage. After  
507 verification of the drug accountability, proper destruction of the used pens will be ensured.

508

### 509 **3.8 Study duration**

510 The full study period constitutes 16 weeks.

511



512 **3.9 Trial timetable**

513 The anticipated timetable for the trial is:

514

|                      |                |
|----------------------|----------------|
| Start of recruitment | March 2013     |
| End of recruitment   | May 2015       |
| Last treatment       | September 2015 |

515

516

517 **4 PATIENT SELECTION**

518

519 **4.1 Number of patients and target population**

520 Planned number of subjects to be screened (i.e. documented informed consent): 150 (Screen failure rate =  
521 15-20 %). Number of subjects planned to be randomized and started on trial product: 125. Number of  
522 subjects expected to complete the trial: 100.

523 Hundred patients will be included. The patients will be recruited via Psychiatric Center Copenhagen or via  
524 other psychiatric centres in the Capitol Region of Copenhagen. Recruitment will take place through direct  
525 contact or through contact by mail or telephone. The expected number of dropouts is difficult to estimate,  
526 since similar interventions with daily subcutaneous injections have not, to our knowledge, been performed  
527 before among psychiatric patients. In the study by Astrup et al., 16 persons out of 90 (18%) in the  
528 liraglutide, 1.8 mg group over the 20 weeks trial period. We will expect the withdraw to be a little higher in  
529 our patient population over time, but this effect is expected to be counteracted by our shorter study  
530 duration. Consequently, we expect a drop-out rate of 20 % in our study population over the 16 weeks trial  
531 period. At least eighty patients have to complete the full 16 week trial. If the drop out rate should turn out  
532 to be higher than 20 %, more patients will be included in order to reach the goal of eighty patients  
533 completing the study. In that case change in sample size will be documented in a substantial protocol  
534 amendment.

535

536 **4.2 Patient screening**

537 Eligible patients will be informed about the possibility to participate in this study. Before any trial related  
538 procedures are performed, the patient must be thoroughly informed about the study and he/she must sign  
539 and date the informed consent form. A pre-treatment evaluation will be carried out to screen the patients  
540 according to inclusion and exclusion criteria (see Treatment Procedure).

### 4.3 Inclusion criteria

- 542 • Informed oral and written consent
- 543 • Diagnosed with schizophrenia, schizotypal disorder or paranoid psychosis according to the
- 544 criteria of ICD10 (International Classification of Diseases, World Health Organization) or the
- 545 DSM-IV (Diagnostic and Statistical Manual of Mental Disorders, Fourth Edition, the
- 546 American Psychiatric Association)
- 547 • and on stable antipsychotic treatment with either clozapine or olanzapine for at least 6
- 548 months (without dose change for at least 30 days)
- 549 • Stable co-medications for at least 30 days.
- 550 • Age  $\geq 18$  years and  $\leq 65$  years
- 551 • Stable weight (defined as less than 5% change in weight over the last 3 month before
- 552 inclusion)
- 553 • BMI  $\geq 27$  kg/m<sup>2</sup>
- 554 • Dysglycaemia (IFG, i.e. [fasting](#) plasma [glucose](#) level from 6.1 mmol/L to 6.9 mmol/L or IGT, i.e.
- 555 two-hour glucose levels of 7.8 to 11.0 mmol on the 75-g [oral glucose tolerance test and a fasting](#)
- 556 [plasma glucose](#) of less than 7.0 mmol/L).

### 4.4 Exclusion criteria

- 559 • Compulsory treatment
- 560 • Females of child bearing potential who are pregnant, breast-feeding or have intention of
- 561 becoming pregnant or are not using adequate contraceptive measures
- 562 • Subjects treated with corticosteroids or other hormone therapy (except estrogens)
- 563 • Any active substance abuse or dependence for the past 6 months (except for nicotine)
- 564 • Impaired hepatic function (liver transaminases  $>2$  times upper normal limit)
- 565 • Impaired renal function (se-creatinine  $>150$   $\mu$ M and/or macroalbuminuria)
- 566 • Impaired pancreatic function (acute or chronic pancreatitis and/or amylase  $>2$  times upper
- 567 normal limit)
- 568 • Cardiac problems defined as decompensated heart failure (NYHA class III or IV), unstable
- 569 angina pectoris and/or myocardial infarction within the last 12 months
- 570 • Uncontrolled hypertension (systolic blood pressure  $>180$  mmHg, diastolic blood pressure
- 571  $>100$  mmHg)
- 572 • Any condition that the investigator feels would interfere with trial participation
- 573 • Receiving any investigational drug within the last 3 months
- 574 • Use of weight-lowering pharmacotherapy within the preceding 3 month
- 575 • Type 1 or 2 diabetes with HbA1c  $> 6.5\%$

### 4.5 Patient withdrawal

578 Completion or trial termination for any reason will be fully documented in the clinical record form (CRF)

579 pages. Patients are free to withdraw from the trial at any time without providing reason(s) for withdrawal

580 and without prejudice to further treatment. The reason for withdrawal may be withdrawal of consent,

581 treatment failure, adverse event(s), pregnancy discovered during the trial, significant worsening (Clinical  
582 Global Impressions-Improvement (CGI-I) score of 6 or 7 (much or very much worse), Change in the  
583 dosing of olanzapine or clozapine of more than 20% or loss to follow-up. The reason(s) will be recorded  
584 in the CRF. Dropouts will be replaced until 80 patients have completed the treatment period. Data from  
585 dropouts will be included in data processing. Patients withdrawing from the trial should be encouraged to  
586 go through the same final evaluations as patients completing the trial according to the protocol with special  
587 focus on safety. The aim is to record data in the same way as for patients who complete the trial. Otherwise  
588 data will be recorded as consented by the patient. This will be documented in the CRF.  
589

## 590 **5 TREATMENT PROCEDURE**

591

592 The study consists of a pre-treatment evaluation followed by a 16 weeks treatment period where patients  
593 are randomized to treatment with either 1) liraglutide (subcutaneous injections using Liraglutide 6.0  
594 mg/mL, 3.0 mL pre-filled pen-injectors) or 2) placebo (subcutaneous injections, using Liraglutide  
595 placebo, 3.0 mL pre-filled pen-injectors).

596

### 597 **5.1 Pre-treatment evaluation**

598 Before screening, all patients will be provided oral and written information about the trial,  
599 including the most common adverse events, and the procedures involved in the study. All subjects  
600 will be fully informed, verbally and in writing, of their rights and responsibilities while participating  
601 in the trial. They will have the opportunity to ask questions, have ample time to consider  
602 participation and must give both signed and dated consent to be included in the trial. The total  
603 duration of the trial for a patient will be 16 weeks. Each patient will attend regular visits (every 4  
604 weeks) to the clinic in order to draw blood samples, evaluate side effects, global illness severity  
605 and measure body weight and waist circumference. Antipsychotic medication and possible IGF /  
606 IGT / dysglycaemia history will also be obtained.

607 Pre-treatment evaluation will only be performed after the patient has agreed to participate and  
608 has signed and dated the informed consent form. No treatment will be initiated before the signed  
609 consent has been given. If the patient meets all inclusion criteria, an appointment for the first visit  
610 will be set up. The clinical examinations will be conducted at the three community mental health  
611 centres and wards affiliated with Psychiatric Centre Copenhagen. If not enough patients can be  
612 included from til centre, other psychiatric centres in the Capital Region of Copenhagen will be  
613 included.  
614

### 615 **5.2 Treatment evaluation**

616 A 75 g-oral glucose tolerance test (OGTT) will be performed at baseline and after 16 weeks of  
617 treatment in all participants. The procedures are as follows: 75 g water-free glucose dissolved in  
618 300 ml H<sub>2</sub>O is to be ingested during the first 5 minutes of the test. Blood is sampled from a cannula  
619 inserted in a cubital vein 15, 10 and 0 min before oral intake of the glucose load and 5, 10, 15, 20,  
620 30, 40, 50, 60, 90, 120, 150, 180 and 240 min after. At each time-point blood is drawn for serum /  
621 plasma analyses for glucose, insulin, C-peptide, glucagon, intact and total GLP-1 and GIP,

622 respectively. During both experimental days the hand with the cannula is kept in a heating box (42  
623 °C) throughout the test.

624 After baseline examinations the groups will be randomized to receive blinded treatment with  
625 either liraglutide s.c. using Liraglutide 6.0 mg/mL, 3.0 mL pre-filled pen-injectors or placebo, using  
626 Liraglutide placebo, 3.0 mL pre-filled pen-injectors.

627 Victoza®/Liraglutide placebo, 3.0 mL pre-filled pen-injector is administered subcutaneously one time  
628 daily in the entire treatment period (Day 1-7: 0.6 mg Victoza®/Liraglutide placebo, 3.0 mL pre-filled pen-  
629 injector; Day 8-14: 1.2 mg Victoza/Liraglutide placebo, 3.0 mL pre-filled pen-injector; Day 15 and rest of the  
630 study: 1.8 mg Victoza®/Liraglutide placebo, 3.0 mL pre-filled pen-injector). Patients who, due to adverse  
631 events, do not tolerate up-titration to 1.8 mg Liraglutide 6.0 mg/mL, 3.0 mL pre-filled pen-injector will  
632 remain on 1.2 mg of Liraglutide 6.0 mg/mL, 3.0 mL pre-filled pen-injector. The patients are instructed in  
633 injection technique. Compliance and adverse events are noted during the entire period. If the patient  
634 cannot self inject Victoza®/Liraglutide placebo, 3.0 mL pre-filled pen-injector, a contact person will assist.  
635 Assisting contact persons, i.e. assisting nurses, are blinded to the treatment too.

636

637 **Table 1: Study flow chart**  
 638

|                                                 | Screening<br>(max 2<br>weeks<br>before<br>week 0) | Inclusion<br>(week 0) | Follow-up<br>(week 4) | Follow-up<br>(week 8) | Follow-up<br>(week 12) | Follow-up<br>(week 16) |
|-------------------------------------------------|---------------------------------------------------|-----------------------|-----------------------|-----------------------|------------------------|------------------------|
| Introduction, informed content, blood screening | X                                                 |                       |                       |                       |                        |                        |
| Drug dispensing                                 |                                                   | X                     |                       | X                     |                        |                        |
| Blood sampling                                  |                                                   | X                     | X                     | X                     | X                      | X                      |
| Weight                                          |                                                   | X                     | X                     | X                     | X                      | X                      |
| Blood pressure                                  |                                                   | X                     | X                     | X                     | X                      | X                      |
| OGTT                                            |                                                   | X                     |                       |                       |                        | X                      |
| DEXA scanning                                   |                                                   | X                     |                       |                       |                        | X                      |
| Self-reported dietary                           |                                                   | X                     | X                     | X                     | X                      | X                      |
| Height                                          |                                                   | X                     |                       |                       |                        |                        |
| Waist circumference                             |                                                   | X                     | X                     | X                     | X                      | X                      |
| Exercise records                                |                                                   | X                     | X                     | X                     | X                      | X                      |
| The Schizophrenia Quality of Life Scale (SQLS)  |                                                   | X                     |                       |                       |                        | X                      |
| Clinical Global Impression, Improvement (CGI-I) |                                                   | X                     |                       |                       |                        | X                      |
| Clinical Global Impression, Severity (CGI-S)    |                                                   | X                     |                       |                       |                        | X                      |
| Global Assessment of Function (GAF)             |                                                   | X                     |                       |                       |                        | X                      |

|                                                      | Screening<br>(max 2<br>weeks<br>before<br>week 0) | Inclusion<br>(week 0) | Follow-up<br>(week 4) | Follow-up<br>(week 8) | Follow-up<br>(week 12) | Follow-up<br>(week 16) |
|------------------------------------------------------|---------------------------------------------------|-----------------------|-----------------------|-----------------------|------------------------|------------------------|
| Alcohol Use Disorders<br>Identification Test (AUDIT) |                                                   | X                     |                       |                       |                        | X                      |

639

640

## 641 **6 ASSESSMENT OF EFFICCY**

642

### 643 **6.1 Clinical response**

644 The clinical response of Liraglutide 6.0 mg/mL, 3.0 mL pre-filled pen-injector compared to  
 645 Liraglutide placebo, 3.0 mL pre-filled pen-injector is assessed by monitoring the change from  
 646 baseline in glucose tolerance (measured by area under the curve (AUC) for the plasma glucose  
 647 (PG) excursion following a 4-hour 75 g oral glucose tolerance test (OGTT) at inclusion (week 0) and  
 648 at follow up, week 16. In addition, a number of secondary endpoints are included too.

### 649 **6.2 Blood samples**

650 Glycaemic control is evaluated by an OGTT and level of HbA1c on the day of inklusion (basal level)  
 651 and after 16 weeks of treatment. The endocrine pancreas function is assessed by plasma  
 652 concentrations of insulin, C-peptide and plasma glucagon. Additionally levels of incretin hormones  
 653 will be evaluated in the fasting state and after oral glucose (amount of blood max 150 ml. per test)

654

655 **7 ASSESSMENT OF SAFETY**  
656

657 **7.1 Serious adverse event (SAE) and serious adverse reactions (SAR)**

658 **7.1.1 Definition of SAE and SAR**

659 SAE, i.e. there exists a relationship between the drug or the experiment and the untoward effect, and  
660 SAR, i.e. a noxious event occurring in a treated patient in an experiment, which is not necessarily related to  
661 the treatment is any untoward medical occurrence that at any dose:

662 1) results in death or

663 2) is life-threatening or

664

665 NOTE: The term “life-threatening” in the definition of “serious” refers to an event in which the  
666 patient was at risk of death at the time of the event; it does not refer to an event, which  
667 hypothetically might have caused death if it were more severe.  
668

669 3) requires inpatient hospitalization or prolongation of existing hospitalization<sup>1</sup> or

670 4) results in persistent or significant disability/incapacity<sup>2</sup>, or

671 5) is a congenital anomaly/birth defect

672

673 and is either known (SAE or suspected (SAR)

674

675 In addition, medical and scientific judgment is required to decide if prompt notification is required in other  
676 situations, i.e. any event which the investigator regards as serious that did not strictly meet the criteria  
677 above but may have jeopardized the subject or required intervention to prevent one of the outcomes listed  
678 above, or which would suggest any significant hazard, contraindication, side effect or precaution that may  
679 be associated with the use of the drug.

680 **Reporting of SAE and SAR**

681 The investigators must immediately report any SAE and SAR to the sponsor occurring between the  
682 treatment with study drug and completion of last follow-up, i.e., 1 month after the treatment, whether or

---

<sup>1</sup> Complications occurring during hospitalisation are AEs and are SAEs if they cause prolongation of the current hospitalisation. Hospitalisation for elective treatment of a pre-existing non worsening condition is not, however, considered an AE. The details of such hospitalisations must be recorded on the medical history/physical examination page of the CRF.

<sup>2</sup> An AE is incapacitating or disabling if it results in a substantial and/or permanent disruption of the patient’s ability to carry out normal life functions.

683 not considered related to study drug. All pregnancies occurring during the study, although not SAEs, should  
684 be reported using the SAE reporting procedures and will be reported directly to Novo Nordisk.

685

686 The investigator should not wait to receive additional information to fully document the event before  
687 notifying a SAE, although additional information may be requested. Where applicable, information from  
688 relevant laboratory results, hospital records and autopsy reports should be obtained. The investigators are  
689 also required to submit follow-up reports until such time as the SAE or SUSAR has resolved or in the case of  
690 permanent impairment, until the SAE or SUSAR stabilizes.

691

692 The sponsor will report all SAEs to the Ethics Committees (IECs) and all SARs to the Danish Medical Agency  
693 once a year together with a report on the safety of the study patients. All SAEs and SARs will be reported to  
694 Novo Nordisk within 15 days from the investigator getting knowledge of the case. Details of SAEs and SARs  
695 will be noted on the adverse event pages in the CRF. There will be no formal follow-up after last patient  
696 visit but all patients have the opportunity to contact the investigators in case of uncertainties. Instances of  
697 death, congenital abnormality or an event that is of such clinical concern as to influence the overall  
698 assessment of safety, if brought to the attention of the investigators at any time after cessation of study  
699 medication and linked by the investigators to this study should be reported.

700

### 701 **7.1.3 Suspected unexpected serious adverse reaction (SUSAR)**

702 Any serious adverse event that is unexpected will immediately be reported by sponsor to the Danish  
703 Medical Agency. SUSARs that result in death or are life-threatening will be reported to the Danish Medical  
704 Agency at the latest 7 days after the sponsor has been notified about it. After reporting the SUSAR, the  
705 sponsor will provide the Danish Medical Agency all relevant further information on the course of case  
706 within 8 days. SUSARs that do not result in death or are not life-threatening will be reported to the Danish  
707 Medical Agency at the latest 15 days after sponsor has been notified about the SUSAR. Any report will be  
708 followed by comments about any consequences for the research project. Sponsor will moreover report any  
709 SUSARs to the marketing authorization holder (Novo Nordisk).

710

## 711 **7.2 Adverse event**

### 712 **7.2.1 Definition of adverse event**

713 An adverse event (AE) is any untoward medical occurrence in a patient or clinical investigation subject  
714 administered a pharmaceutical product and which does not necessarily have a causal relationship with this  
715 treatment. An AE can therefore be any unfavourable and unintended sign (including an abnormal  
716 laboratory finding), symptom, or disease temporally associated with the use of a medicinal (investigational)  
717 product, whether or not related to the medicinal (investigational) product. All events occurring after the  
718 subject has signed the study consent form should be reported as an adverse event.



719 **7.2.2 Reporting of adverse event**

720 AEs related to the treatment according to the investigator will be recorded in the CRF. All reported AE's will  
721 be followed up until resolved or as clinically required.

722 **7.2.3 Assessment of adverse event**

723 AEs may be reported spontaneously by the patient through open (non-leading) questioning during the  
724 study. As far as possible, all AEs must be described by their duration (start and stop date), severity (mild,  
725 moderate, or severe), relationship to treatment (yes, uncertain, no), and according to the need of other  
726 specific therapy. The onset of AEs will be classified relative to the stage of treatment.

727 **7.3 Reporting at the end of the study**

728 All SAEs, SARs, SUSARs, and AEs will be reported to the Danish Medical Agency at the end of the study.

729

730 **8 STATISTICAL EVALUATION**

731

732 **8.1 Statistical analyses**

733 All analyses will be performed using the intent-to-treat principle on subjects who were  
734 randomized and received at least one dose of the trial compound (Liraglutide 6.0 mg/mL, 3.0 mL  
735 pre-filled pen-injector or Liraglutide placebo, 3.0 mL pre-filled pen-injector). Missing data will be  
736 imputed using a last-observation-carried-forward (LOCF ) methods. Analyses will be performed  
737 using SPSS, with alpha set at 0.05.

738 The primary outcome will be change in glucose tolerance from baseline. Secondary outcomes  
739 include changes in blood pressure, fasting glucose, fasting insulin sensitivity and beta cell function  
740 (evaluated by HOMA), fat mass and fat percentage (measured by DEXA scanning), liver function,  
741 lipid profiles, triglycerides, body weight, waist circumference and dietary and exercise behaviours  
742 (evaluated with 24 hour recall and 7 day recall, respectively) as well as quality of life.

743

744 All *continuous outcomes*, i.e., change in metabolic parameters, weight, body composition  
745 parameters, and exercise and diet behaviour, will be analyzed using ANOVA from baseline to last  
746 observation endpoint. In case, relevant baseline demographic, illness or treatment parameters  
747 differ significantly between the two groups, these parameters will be included in an ANCOVA  
748 model. *Categorical outcomes*, ie, shift from obesity, overweight, hyperglycemia,  
749 hypertriglyceridemia etc to the next lower risk category at last observed endpoint, will be analyzed  
750 using chi square analyses. In case, relevant baseline demographic, illness or treatment parameters  
751 differ significantly between the two groups, these parameters will be included in a multivariate  
752 logistic regression analysis model.

753

754 **8.2 Justification of sample size**

755 The study is an explorative study and the required patient population size (see above) is based on  
756 significance level ( $\alpha$ ) of 5%, a power ( $1-\beta$ ) of 80%, where  $\beta$  (20%) is the risk of accepting a

757 hypothesis that is false, an estimated minimum relevant difference (MIREDIF) of the area under  
758 the curve (AUC) for the PG excursion following an OGTT after 16 weeks of intervention. Thus, with  
759 the above-mentioned power, significance level, MIREDIF and SD, the trial requires 50 patients in  
760 each arm; a total of 100 patients.

761

### 762 **8.3 Disposition of patients**

763

764 Efficacy results will be presented for the per-protocol (PP) efficacy population and intent-to-treat  
765 (ITT) efficacy population.

766

#### 767 Per-protocol (PP) efficacy population:

768 This population consists of all treated patients. Only observed data will be part of the per-protocol analysis.

#### 769 Intent-to-treat (ITT) efficacy population:

770 This population will consist of the entire population for whom any aspect of treatment was initiated. This  
771 population will be analyzed using the LOCF method to impute missing values and to avoid possible bias  
772 introduced by non-random dropout of patients.

773

### 774 **8.4 End of the study before time**

775 The study will be stopped for a given patient if this patient wishes to withdraw from the study or in case of  
776 extraordinary circumstances that makes it impossible for the patient to complete the study. Moreover,  
777 extraordinary events that prevent the study to be carried through will lead to interruption of the whole  
778 study for all participating patients, which will be informed about the decision and the reason for ending the  
779 study before time.

780

## 781 **9 DATA MANAGEMENT**

782

### 783 **9.1 Source data identification and source data verification**

784 Patient information collected in the CRF but not recorded in the patient notes is regarded as source data.  
785 However, the patient's participation and any serious adverse events related to the study treatment should  
786 be documented in the patient hospital files. In the process of ensuring data completeness and accuracy,  
787 source data verification (SDV) should be performed. The patients will be informed in writing about the need  
788 for SDV. SDV will be performed by the GCP monitors. To be able to do SDV, the investigators will require  
789 and review relevant part of the patient hospital files.

790

### 791 **9.2 Subject data protection**

792 Patient number, initials, date of birth and sex will identify the patients in the CRFs. The sponsor-investigator  
793 is responsible for keeping a list of all randomized patients including patient numbers, full names and date of

794 birth. In addition, the sponsor-investigator will prepare a list of patients who were screened for  
795 participation of the trial but were not randomized and the reason for non-eligibility. The patients will be  
796 informed in writing that the results will be stored and analyzed in a computer according to national laws, as  
797 applicable, and that patient confidentiality will be maintained.

798

### 799 **9.3 Data handling**

800 All data obtained during the study will be documented in the individual CRF. The reasons for any missing  
801 data must be noted in the CRF. Corrections should be made legibly, dated and initialed. Incorrect entries  
802 must not be covered by correction fluid, or obliterated, or made illegible in any way. Source data, source  
803 documents, CRF, protocol and amendments, drug accountability forms, correspondence, patient  
804 identification list, informed consent forms, and other essential GCP documents will be retained for at least  
805 15 years after the part is completed at the study site. Patient data will be entered continuously into the  
806 database by the sponsor-investigator.

807

## 808 **10 ADMINISTRATIVE PROCEDURES**

809

### 810 **10.1 Insurance**

811 The investigators make sure that the participation of the patients in the study is covered by insurance via  
812 the hospital.

813

### 814 **10.2 Ethics committee (EC) / institutional review board**

815 The trial protocol, including the patient information and informed consent to be used, must be approved by  
816 the regional EC. Written approval must be obtained before enrolment of any subjects into the trial. It is the  
817 responsibility of the sponsor-investigator to obtain the letter of approval. The investigators will ensure that  
818 this study is conducted in full conformance with the Edinburgh, Scotland (2000), amendment to the  
819 Declaration of Helsinki 1964 and with national laws and regulations for clinical research. The sponsor-  
820 investigator is responsible for informing the ethics committees and regulatory authorities of any SAE and/or  
821 major amendments to the protocol as per national requirements. The sponsor-investigator should file all  
822 correspondence and notify the ethics committees and regulatory authorities when the study is completed.

### 823 **10.3 Ethical considerations**

824 This study is not considered as having any ethical problems. The treatment is associated with minimal  
825 discomfort for the participating patients comprising blood sample collection and daily injection of  
826 Liraglutide 6.0 mg/mL, 3.0 mL pre-filled pen-injector or Liraglutide placebo, 3.0 mL pre-filled pen-injector in  
827 the subcutis in the abdomen, in the thigh or in the upper arm. Common adverse events are mild to  
828 moderate transient gastrointestinal symptoms (nausea, vomiting and diarrhoea) and headache affecting  
829 around 10-15% of treated patients. Less commonly, the patients may experience stomach pain, anorexia,  
830 constipation, fever, reflux, gastritis, dizziness, tiredness and upper airway infection. Rare adverse events  
831 comprise acute pancreatitis, thyroid adenoma and angioedema.

832 When collecting blood, some patients may experience minor discomfort when the needle penetrates the  
833 skin and rarely a small bleeding occurs. The amount of blood collected during the entire study period is  
834 around 600 ml and only patients with normal blood haemoglobin will be included.

835 Symptoms of hypoglycaemia such as sweating, tremor, confusion, nausea, nervousness, weakness, hunger,  
836 trouble speaking, palpitations, anxiety and irritability can be experienced by some patients.

837 Patients will be treated on highest tolerated dose of Liraglutide 6.0 mg/mL, 3.0 mL pre-filled pen-injector.  
838 Severe systemic adverse events are not expected.

839  
840 The patients will receive thorough verbal and written information about the risk of developing the  
841 mentioned adverse events. Verbal and written informed consent will be obtained from patients prior to  
842 participation in accordance with current rules. It will be emphasized in the declaration of consent that  
843 participation in the project is voluntary and that patients may withdraw their consent to participate at any  
844 time without providing a reason and without any consequences for the patient's current or future  
845 treatment by the health service.

846

847 The participating patients will receive a study number when entering the study. All data forms and blood  
848 samples will only be labelled with the patient's initials and study number. The sponsor-investigator is  
849 responsible for keeping a list separately for all randomized patients containing patient numbers, full names  
850 and date of birth. Extra plasma and white blood cells will be stored for up to 10 years after the end of the  
851 study for repeated measurements in case of error analysis or the need for more analyses. The use of these  
852 samples will demand a new approval. The protocol will be notified to the Danish Data Protection Agency,  
853 The Danish Ethics Committee and the Danish Medicines Agency.

854

#### 855 **10.4 Patient informed consent**

856 The investigators are responsible for giving the patients complete verbal and written information about the  
857 nature, purpose, and possible risks and benefits of the trial. The patients must also be notified that they are  
858 free to withdraw from the trial at any time. The patients should have reasonable time to read and  
859 understand the information before signing. The sponsor-investigator is responsible for obtaining signed and  
860 oral EC-approved informed consent from all subjects before performing any trial-related procedures.

861 A copy of the patient information and of the patient informed consent form will be given to the patients.  
862 The signed consent form will be kept by the sponsor-investigator, either in the patient hospital file or in the  
863 sponsor-investigator's study file.

864 Participating patients will be informed about the result of the study if they express a wish for this.

865

#### 866 **10.5 Regulatory affairs**

867 A notification will be submitted to national authorities before commencement of the trial, as applicable  
868 according to local regulations. Notifications and reports will be filed according to ICH E6(R1): GCP:  
869 Consolidated guideline, CPMP/ICH/135/95, and national guidelines including Clinical Trials Directive  
870 2001/20/EC.

871

## 872 **10.6 Trial monitoring**

873 Prior to the start of the study, the sponsor-investigator will ensure that the other investigators are familiar  
874 with the protocol, CRFs and other study documents and procedures. The sponsor-investigator will be visited  
875 on a regular basis by the monitor, who will check trial procedures, including safety assessments, drug  
876 handling, data recording and SDV. The monitor will be allowed to review relevant hospital records to  
877 confirm that required protocol procedures are being followed and check consistency between patient  
878 record and CRF. Incorrect or missing entries onto the CRFs will be addressed as data queries and must be  
879 corrected immediately. Trial monitoring will not jeopardize patient confidentiality. The trial will be  
880 monitored by the GCP unit of Copenhagen University. The clinical trial will be conducted in compliance with  
881 the protocol, according to ICH E6: Good Clinical Practice: Consolidated guideline, CPMP/ICH/135/95, and  
882 national guidelines including Clinical Trials Directive 2001/20/EC. The trial can be subjected to quality audit.

883

## 884 **10.7 Trial audits and inspections**

885 The patients will be informed in writing about the possibility for audits and/or inspections. The audit and/or  
886 inspection might be performed by the hospital institutional review board/ethics committee or regulatory  
887 authority. In these cases, relevant part of the patient records will be required and reviewed.

# 888 **11 CONFIDENTIALITY AND COMMUNICATION OF RESULTS**

889

## 890 **11.1 Publication**

891 At the end of the trial one or more manuscripts will be prepared for publication in scientific journals. The  
892 investigators will be given 14 days to review and comment on any manuscript/abstract or other means  
893 intended for publication or presentation of the data. While it is the intention that the sponsor-investigator  
894 will be the first author, the published international guidelines for authorship (International Committee of  
895 Medical Journal Editors, 1997) will be adhered to; i.e. 'All persons designed as authors should qualify for  
896 authorship. Each author should have participated sufficiently in the work to take public responsibility for  
897 the content'.

898 The final decision on the order of authorship will be decided when the study has been finalized. The results  
899 from the study may moreover be presented as posters or oral presentations at national and/or  
900 international conferences. The trial will be registered at [www.clinicaltrials.gov](http://www.clinicaltrials.gov) according to the  
901 requirements from the US Food and Drug Administration (FDA) and the International Committee of Medical  
902 Journal Editors.

903

904

## 12 REFERENCES

- 905 1. Krane-Gartiser K, Krane-Gartiser K, Breum L, Glümrr C, Linneberg A, Madsen M, Køster A, Jepsen  
906 PW, Fink-Jensen A (2011). Prevalence of the metabolic syndrome in Danish psychiatric outpatients  
907 treated with antipsychotics. *Nord J Psychiatry*. (Epub ahead of print).
- 908 2. Correll CU, Lencz T, Malhotra AK (2011). Antipsychotic drugs and obesity. *Trends Mol. Med.*  
909 *17(2): 97-107*
- 910 3. Holst JJ (2007). The physiology of glucagon-like peptide 1. *Physiol Rev.* *87:1409-1439*
- 911 4. Vilsbøll T, Karup T, Madsbad S, Holst JJ (2003). Both GLP-1 and GIP are insulinotropic at basal  
912 and postprandial glucose levels and contribute nearly equally to the incretin effect of a meal in  
913 healthy subjects. *Regul Pept.* *114 (2-3): 115-121*
- 914 5. Astrup A, Rössner S, Van Gaal L, Rissanen A, Niskanen L, Al Hakim M, Madsen J, Rasmussen MF,  
915 Lean ME; NN8022-1807 Study Group (2009). Effects of liraglutide in the treatment of obesity: a  
916 randomised, double-blind, placebo-controlled study. *Lancet.* *374(9701):1606-16.*
- 917
- 918 6. Holten MK, Zacho M, Gaster M, Juel C, Wojtaszewski JF, Dela F (2009). Strength training  
919 increases insulinmediated glucose uptake, GLUT4 content, and insulin signaling in skeletal muscle  
920 in patients with type 2 diabetes. *Diabetes.* *53(2):294-305.*
- 921 7. Maayan L, Correll CU (2010). Management of antipsychotic-related weight gain. *Expert Rev*  
922 *Neurother.* *10(7):1175-200.*
- 923
- 924 8. Mukundan A, Faulkner G, Cohn T, Remington G (2010). Antipsychotic switching for people with  
925 schizophrenia who have neuroleptic-induced weight or metabolic problems. *Cochrane Database*  
926 *Syst Rev.* *8;(12):CD006629.*
- 927
- 928 9. Hermes E, Nasrallah H, Davis V, Meyer J, McEvoy J, Goff D, Davis S, Stroup TS, Swartz M,  
929 Lieberman J, Rosenheck R (2011). The association between weight change and symptom reduction  
930 in the CATIE schizophrenia trial. *Schizophr Res.* *128(1-3):166-70.*
- 931
- 932 10. Leucht S, Corves C, Arbter D, Engel RR, Li C, Davis JM. Second-generation versus first-  
933 generation antipsychotic drugs for schizophrenia: a meta-analysis. *Lancet.* *373(9657):31-41.*
- 934
- 935 11. Maayan L, Vakhrusheva J, Correll CU. Effectiveness of medications used to attenuate  
936 antipsychotic-related weight gain and metabolic abnormalities: a systematic review and meta-  
937 analysis. *Neuropsychopharmacology.* *35(7):1520-30.*
- 938

939

**13 Budget (in DKK)****Running costs**

| <b>Blood sampling analyses</b>                                                                   | <b>No. of subjects</b> | <b>Total samples</b> | <b>Price per sample</b> | <b>Total price</b> |
|--------------------------------------------------------------------------------------------------|------------------------|----------------------|-------------------------|--------------------|
| Screening packages                                                                               | 100                    | 100                  | 1.700                   | 170.000            |
| Blood samples during experiment (Glucose, C-peptide, insulin, HbA1C, cholesterol, triglycerides) |                        |                      |                         | 250.000            |
| <b>Total price for blood sampling analyses</b>                                                   |                        |                      |                         | <b>420.000</b>     |
| <b>Subject reimbursement</b>                                                                     |                        |                      |                         |                    |
| DKK 4.000 per subject                                                                            | 100                    |                      | 4.000                   | 400.000            |
| <b>Total price for subject reimbursement</b>                                                     |                        |                      |                         | <b>400.000</b>     |
| <b>Utensils/other costs</b>                                                                      |                        |                      |                         |                    |
| Cannulas, syringes, tubes, storage boxes etc.                                                    |                        |                      |                         | 350.000            |
| DEXA-scan                                                                                        | 100                    | 200                  | 2.000                   | 400.000            |
| <b>Total price for utensils/other</b>                                                            |                        |                      |                         | <b>750.000</b>     |
| <b>Total running costs</b>                                                                       |                        |                      |                         | <b>1.570.000</b>   |

**Salary****Technical staff**

|                                                                                     |         |
|-------------------------------------------------------------------------------------|---------|
| Lab-technician ; 100% of full time for 24 months, clinical experiments and analyses | 600.000 |
| Psychiatric nurse; 100% of full time for 24 months                                  | 700.000 |

|                           |                  |
|---------------------------|------------------|
| <b>Total salary costs</b> | <b>1.300.000</b> |
|---------------------------|------------------|

|                           |                  |
|---------------------------|------------------|
| <b>Total budget (DKK)</b> | <b>2.870.000</b> |
|---------------------------|------------------|

940

941
